# Supplementary material
Source: publisher figshare collection journal article supplement (https://gsapubs.figshare.com/ndownloader/files/22741343)
Supplement: Supplementary file 1 [file 22741343]

## APPENDIX: NORM CALCULATIONS

### (DATA REPOSITORY ITEM 2002136)

The following methodology was used to calculate  $QF^*L^*$  parameters (Table DR2). A Microsoft Excel spreadsheet that performs these calculations is available on request from Rónadh Cox (rcox@williams.edu). Minor phases (MnO, S,  $P_2O_5$ ,  $TiO_2$ ) are ignored in this study, but provision for the phases pyrolusite, apatite and rutile exists in the spreadsheet.

1. Point-count data (volume %) are converted to weight % by multiplying each component by its density to get weight/volume, and then normalizing to 100%.
2. Chemical data (weight %) are recalculated volatile-free by subtracting LOI and normalizing to 100%.
3. The weight % values for both point-count data and chemical data are converted to moles by dividing by molecular weights.
4. The weight % values for framework quartz from the point count data (Q+Ch+silica cement) are subtracted from the weight %  $SiO_2$  from the chemical analysis. This quantity (minus the silica cement) is  $Q_t$ . The remaining  $SiO_2$  plus all other constituents is the sum of feldspar+lithics+other minerals.
5. A normative mineralogy is constructed as follows:
  - (a) All  $K_2O$  plus amounts of  $Al_2O_3$  and  $SiO_2$  in the ratio 1:1:6 are assigned to K-spar.
  - (b) All MgO is assigned to chlorite, using MgO,  $Al_2O_3$  and  $SiO_2$  in the ratio 5:1:3. (The case  $Al_2O_3 < 5 * MgO$  was not encountered.)
  - (c) All  $Na_2O$  plus amounts of  $Al_2O_3$  and  $SiO_2$  in the ratio 1:1:6 are assigned to albite.
  - (d) CaO is assigned to anorthite using the following protocol: if  $CaO < Al_2O_3$ , use all CaO. If  $CaO > Al_2O_3$ , use an amount of CaO equal to the amount of  $Al_2O_3$  remaining. In either case, use CaO,  $Al_2O_3$  and  $SiO_2$  in the ratio 1:1:2.
  - (e) If in step "c"  $CaO > Al_2O_3$ , assign excess CaO to calcite.
  - (f) All  $Fe_2O_3$  goes to Fe oxide.
  - (g) Any remaining  $Al_2O_3$  goes to kaolinite, using  $Al_2O_3$  and  $SiO_2$  in the ratio 1:2.
  - (h) Any remaining  $SiO_2$  is assigned to quartz.
12. The molar quantities of the normative minerals are converted to weight % by multiplying by molecular weight. The quantity  $F^*$  is the sum of normative k-spar+anorthite (+albite, if present) ( $=a+c+d$ ). The quantity  $L^*$  is the sum of all other components ( $=b+e+f+g+h$ ).

**Note:** Assuming no mass-transfer of material,  $F^*$  is a *maximum estimate* of the amount of feldspar in the original sediment. Some of the  $K_2O$ , which is assigned to  $F^*$  may have been present in microphenocrysts in volcanic fragments, as illitic material in sedimentary fragments, or as detrital muscovite grains. Similarly,  $L^*$  is a *minimum estimate* of the amount of lithic material in the original deposit, because some of the material assigned to feldspar may have actually occurred in lithic grains. In addition, some material which may have occurred as non-feldspar detrital mineral grains, e.g. garnet, epidote etc., is also unavoidably included in  $L^*$ .

## DATA REPOSITORY FIGURE CAPTIONS

Fig. DR1. Stratigraphic log of the Pine Creek Conglomerate type section at Pine Creek. Thicknesses in metres. This log, and the logs in Figs. 7-9, represent data collected at cm-scale for sections up to 160 m thick. For this reason the logs are highly stylized. Sedimentary structures are below the resolution of the logs, so their positions in the sections are indicated at the side.

Fig. DR2. Logs of the lower part of the Deadman Quartzite at two locations in the Mazatzal Mountains and at Pine Creek. The unit is sedimentologically homogeneous throughout the outcrop area, but the more proximal deposits in the Pine Creek area show soft-sediment deformation, indicating a steeper depositional slope. Thicknesses in metres. Legend and explanation as for Fig. DR1.

Fig. DR3. Stratigraphic logs of the Maverick Shale. The logs represent the complete formation, but were measured in separate areas where structurally coherent sequences were available. Stratigraphic height increases from left to right. Thicknesses in metres. Legend and explanation as for Fig. DR1.

Fig. DR4. Logs of representative portions of the Mazatzal Peak Quartzite. Stratigraphic height increases from left to right. Thicknesses in metres. Legend and explanation as for Fig. DR1.

## Lithology, bedding types

|                                                                                   |                               |
|-----------------------------------------------------------------------------------|-------------------------------|
|  | Silt and shale                |
|  | Sandstone                     |
|  | Sandstone with muddy partings |
|  | Gravel conglomerate           |
|  | Cobble conglomerate           |
|  | Rhyolite                      |
| .....                                                                             | Pebble layers                 |

## Traction structures

|                                                                                     |                           |
|-------------------------------------------------------------------------------------|---------------------------|
|    | Tabular cross-bedding     |
|   | Trough cross-bedding      |
|  | Wave ripples              |
|  | Herringbone cross-bedding |
|  | Hummocky cross-bedding    |
|  | Flat lamination           |
|  | Clast imbrication         |

## Other structures

|                                                                                     |                                        |
|-------------------------------------------------------------------------------------|----------------------------------------|
|  | Dessiccation cracks                    |
|  | Load structures                        |
|  | Rip-up clasts                          |
|  | Soft-sediment deformation              |
|  | Sandy lenses/scour and fill structures |

## Covered intervals

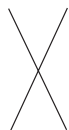

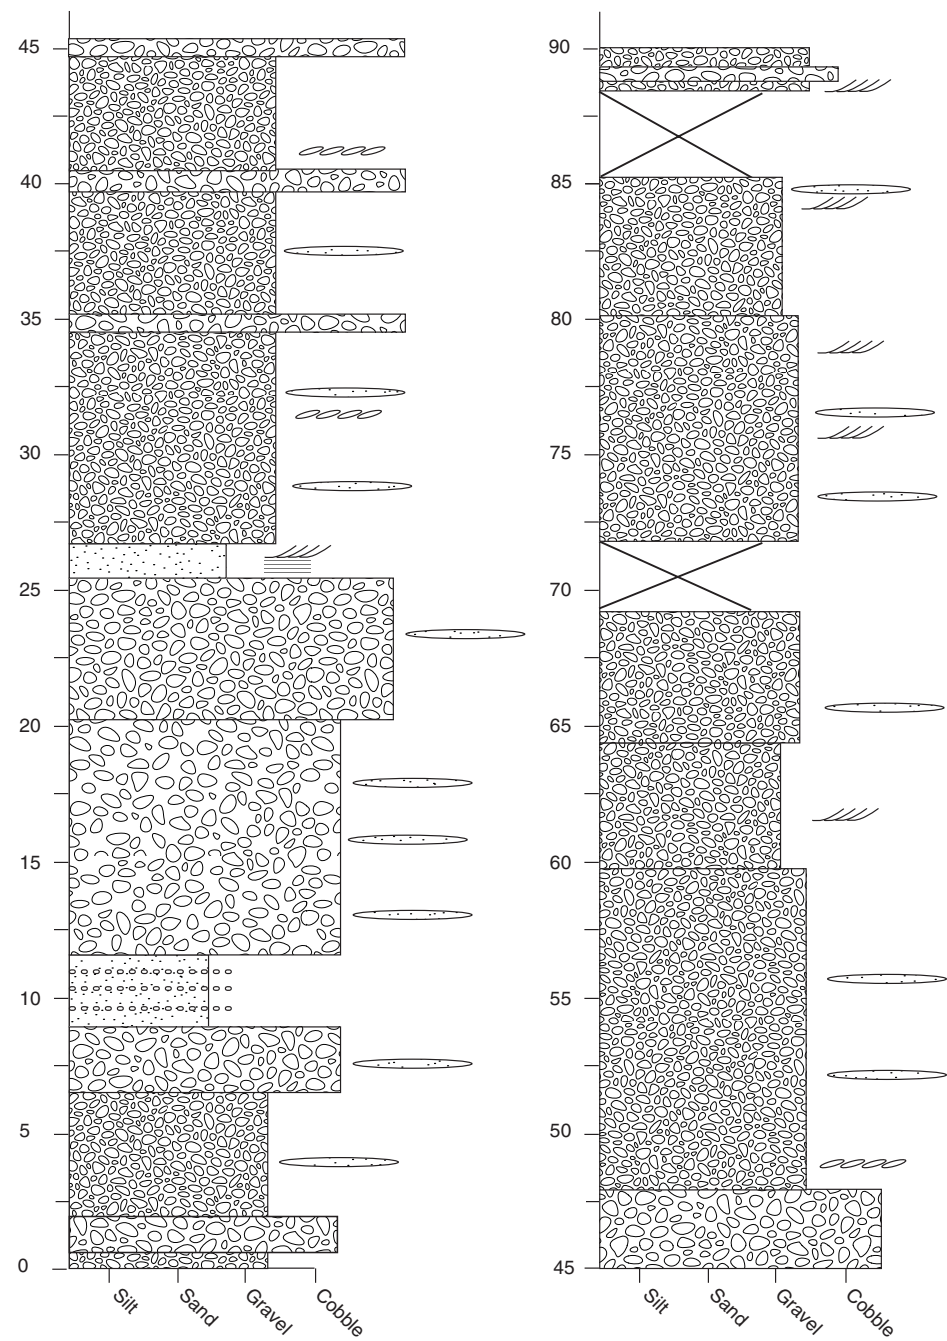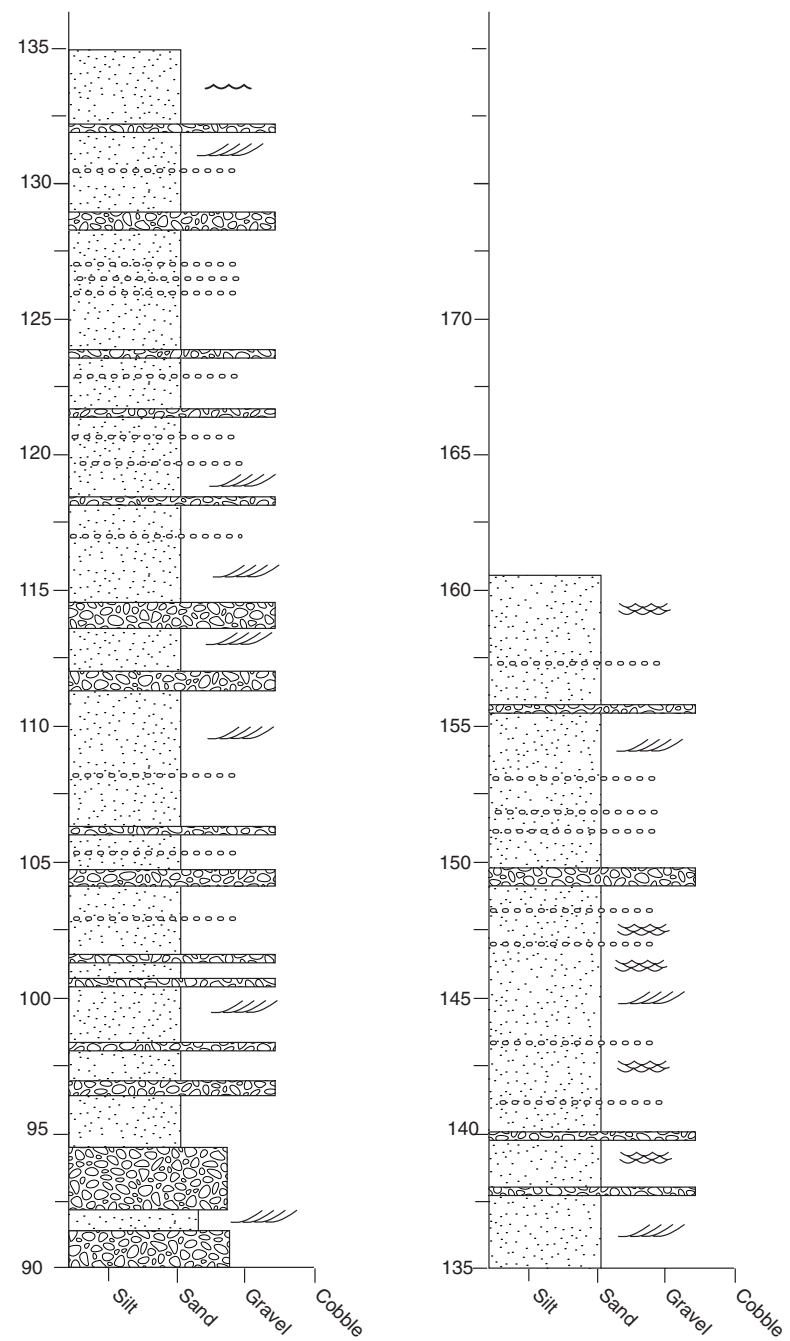

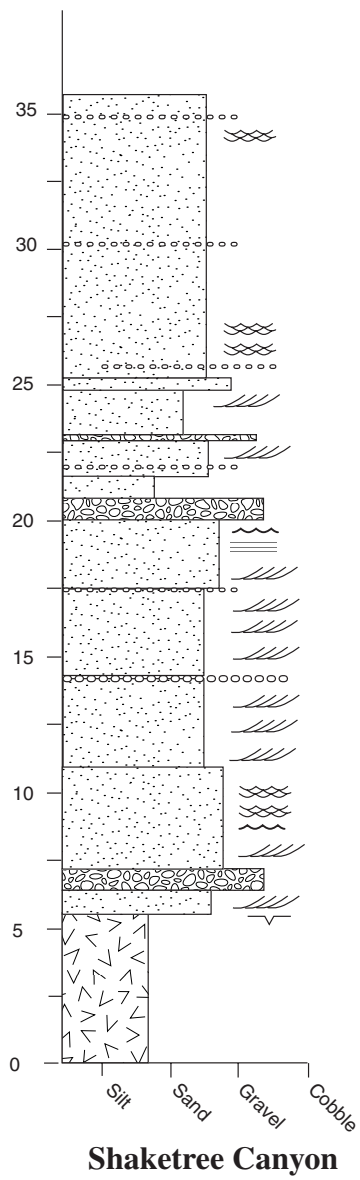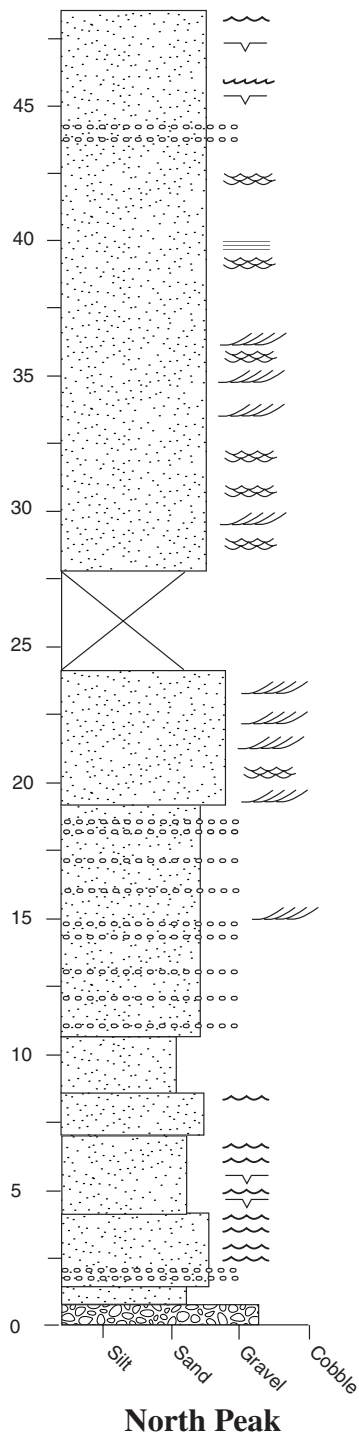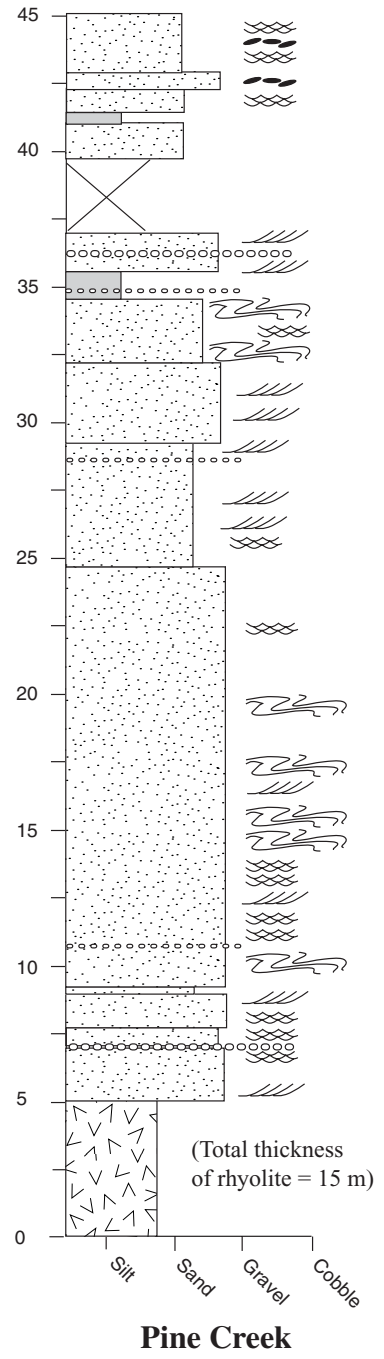

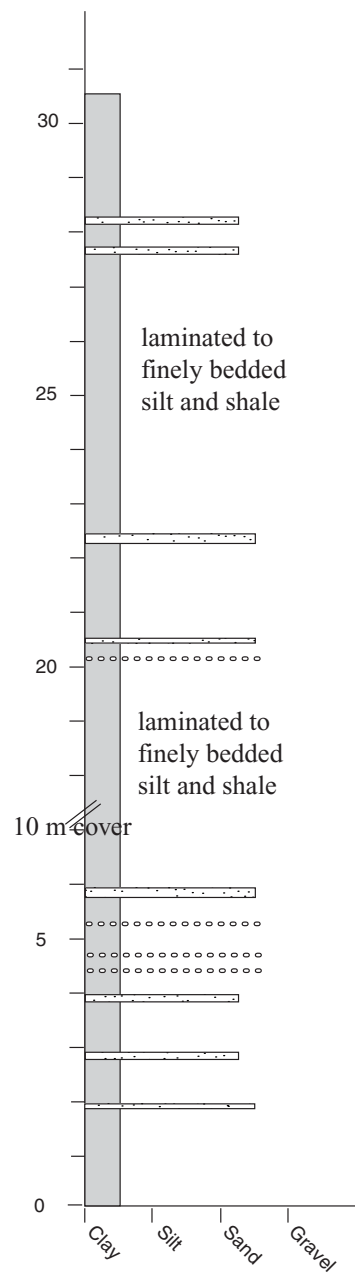

Shake Tree Canyon  
Lower Maverick Shale

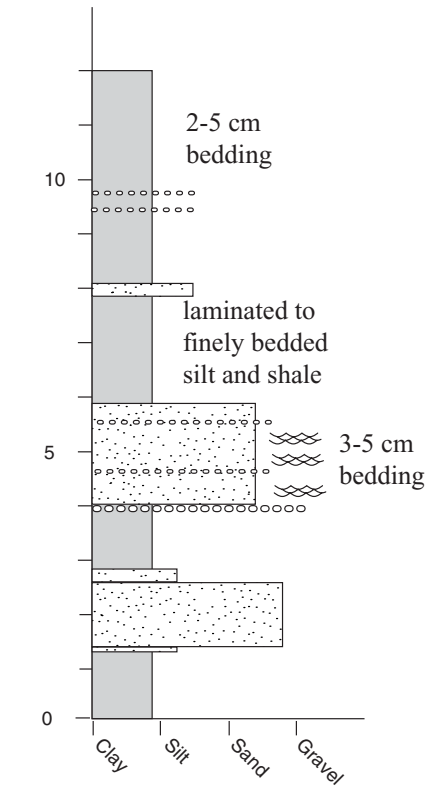

Barnhardt Canyon  
Lower to mid Maverick Shale

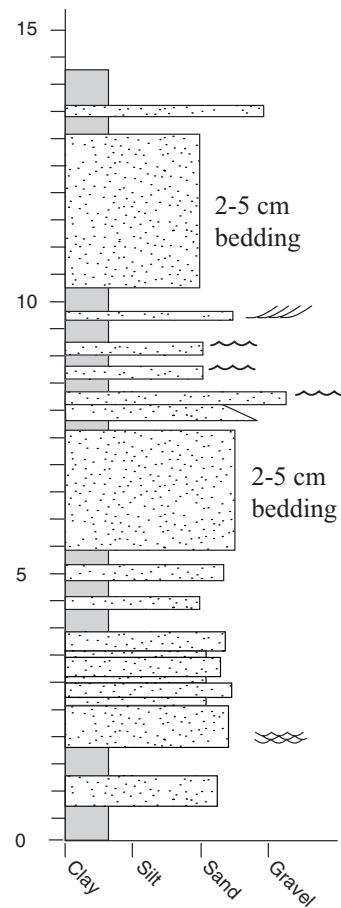

Barnhardt Canyon  
Mid to upper Maverick Shale

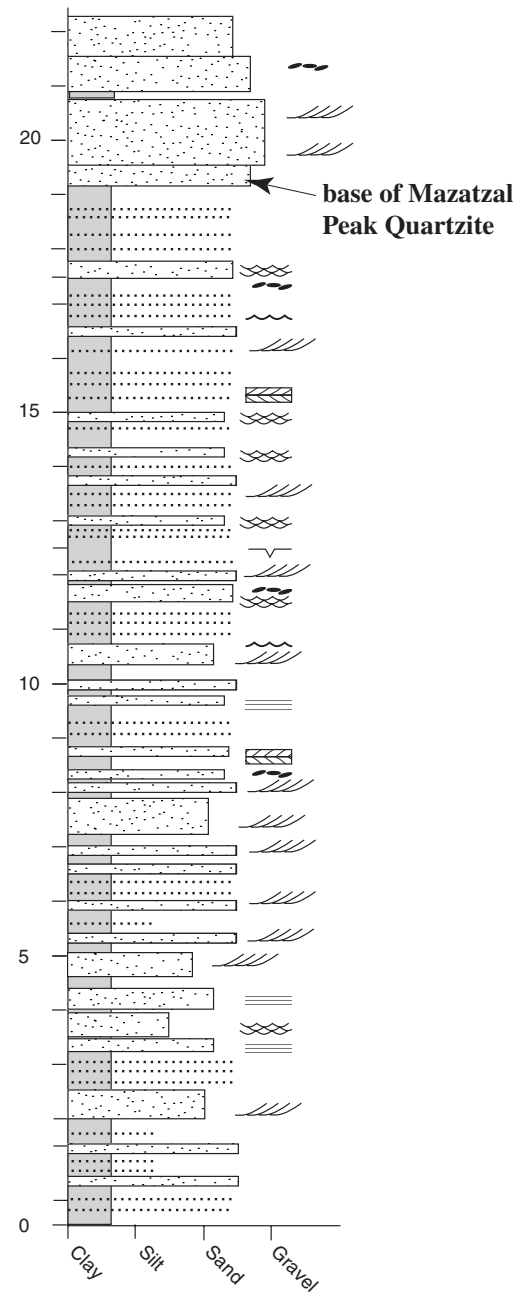

Barnhardt Canyon  
Upper Maverick Shale

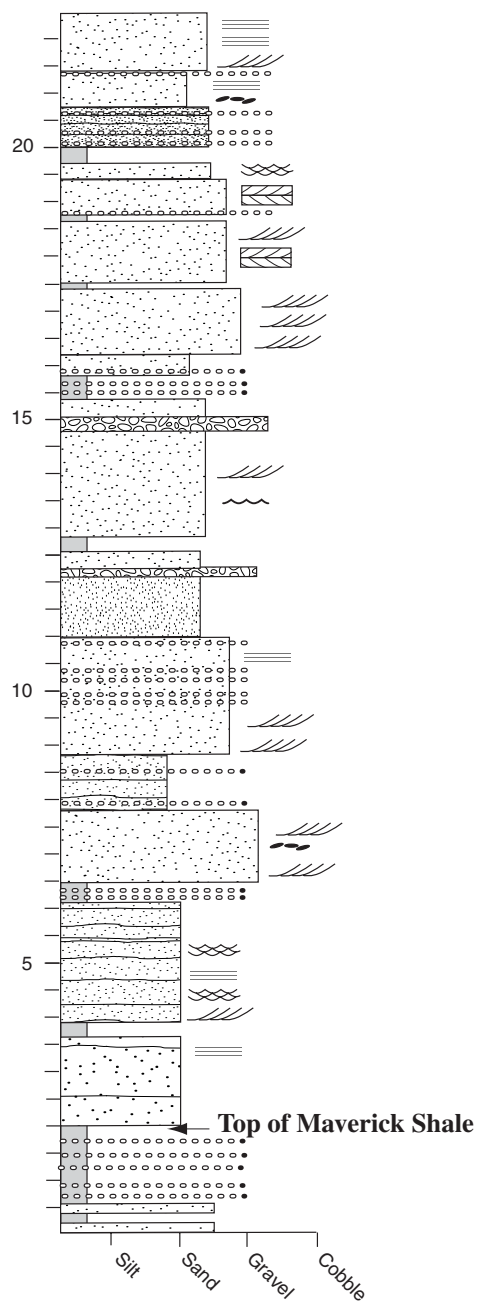

**Shaketree Canyon  
Lower Mazatzal  
Peak Quartzite**

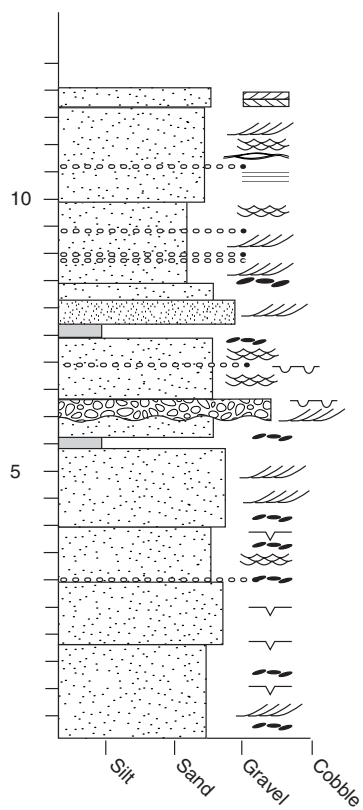

**Lower Barnhardt Canyon  
Middle Mazatzal Peak Quartzite**

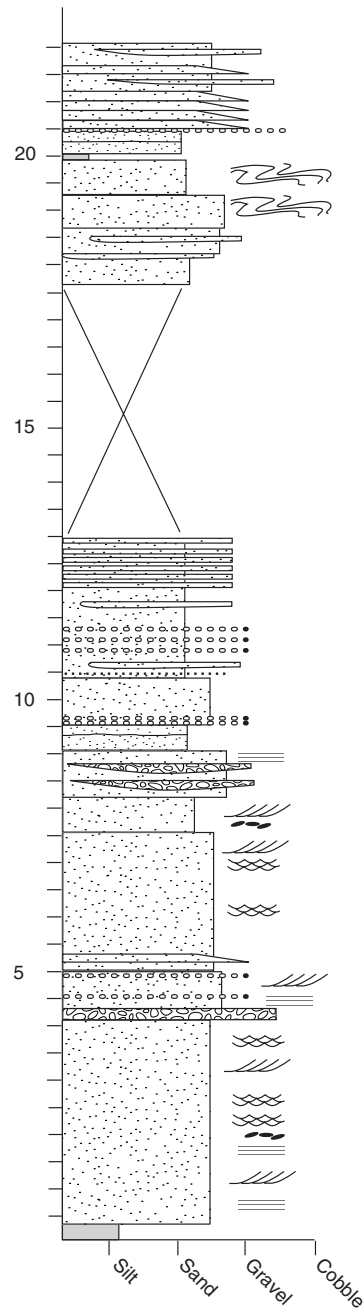

**Upper Barnhardt Canyon  
Middle to Upper  
Mazatzal Peak Quartzite**

Table DR1. Petrographic analysis of Mazatzal Group sandstones in volume percent. Data were collected using a modified Gazzi-Dickinson method (Cox, 1995). 400 framework grains were counted per thin section. Matrix and cement were also recorded, so the total number of datapoints per section ranged up to 680. The error on the compositional estimates therefore ranges from  $\pm 3\%$  to  $\pm 5\%$  (Van der Plas and Tobin, 1965). QFL point count data notation is from Dickinson and Suczek (1979). Normative  $QF^*L^*$  values are calculated from petrologic and chemical data (Table DR2), using methods of Cox and Lowe (1995);  $F^*$ =normative detrital feldspar,  $L^*$ =normative detrital lithic fragments (see text and Appendix for explanation). • = Chemically analyzed samples; see Table DR2. t = Point count data from Trevena (1979)

| Sample Number  | Formation             | Locality        | POINT-COUNT COMPOSITION IN VOLUME PERCENT |          |          |          |          |          |          |          |                       |           |          | OFL PARAMETERS               |           |          |          |                |
|----------------|-----------------------|-----------------|-------------------------------------------|----------|----------|----------|----------|----------|----------|----------|-----------------------|-----------|----------|------------------------------|-----------|----------|----------|----------------|
|                |                       |                 | Detrital Grains                           |          |          |          |          |          |          |          | Authigenic components |           |          | Dickinson QtFNormative QtF*L |           |          |          |                |
|                |                       |                 | Qm                                        | Qp       | Ft       | Lv       | Ls       | Lu       | Chert    | Other    | Matrix                | Silica    | Fe Oxide | Total                        | Qt        | F        | L        | Qt F* L*       |
| DM.STC.443     | Deadman Quartzite     | Shaketree Cany  | 68                                        | 2        | -        | 1        | -        | -        | 2        | -        | 24                    | 3         | -        | 100                          | 99        | -        | 1        |                |
| DM.STC.444     | • Deadman Quartzite   | Shaketree Cany  | 68                                        | 3        | -        | -        | -        | -        | 2        | -        | 18                    | 10        | -        | 100                          | 100       | -        | 0        | 80 - 20        |
| MQP707101      | Deadman Quartzite     | Shaketree Cany  | 73                                        | 1        | -        | -        | 3        | -        | 3        | -        | 19                    | 1         | 1        | 100                          | 96        | -        | 4        |                |
| MQP707102      | Deadman Quartzite     | Shaketree Cany  | 84                                        | 2        | -        | -        | -        | -        | 3        | -        | -                     | 10        | -        | 100                          | 100       | -        | -        |                |
| MQP707103      | Deadman Quartzite     | Shaketree Cany  | 81                                        | -        | -        | -        | -        | -        | 1        | 1        | -                     | 17        | -        | 100                          | 100       | -        | -        |                |
| MQP707104      | Deadman Quartzite     | Shaketree Cany  | 84                                        | -        | -        | -        | -        | -        | -        | 2        | 4                     | 10        | -        | 100                          | 100       | -        | 0        |                |
| MQP707105      | Deadman Quartzite     | Shaketree Cany  | 81                                        | 3        | -        | -        | -        | -        | 1        | -        | 0                     | 12        | 4        | 100                          | 100       | -        | -        |                |
| MQP62622       | Deadman Quartzite     | Shaketree Cany  | 78                                        | -        | -        | -        | -        | -        | 2        | -        | 8                     | 11        | 1        | 100                          | 100       | -        | -        |                |
| MQP62623       | • Deadman Quartzite   | Shaketree Cany  | 62                                        | 2        | 1        | -        | -        | -        | 2        | -        | 16                    | 16        | 2        | 100                          | 99        | 1        | -        | 76 2 22        |
| MQP62625       | Deadman Quartzite     | Shaketree Cany  | 71                                        | -        | -        | -        | -        | -        | -        | -        | 20                    | 8         | 1        | 100                          | 100       | -        | -        |                |
| MD4+           | t Deadman Quartzite   | Maverick Basin  | 74                                        | 3        | -        | -        | -        | 1        | 1        | 2        | 3                     | 17        | -        | 100                          | 99        | -        | 1        |                |
| MQP7026B       | Deadman Quartzite     | North Peak      | 71                                        | 3        | -        | -        | 1        | -        | 2        | -        | 3                     | 17        | 3        | 100                          | 99        | -        | 1        |                |
| MQP70371       | Deadman Quartzite     | North Peak      | 78                                        | -        | -        | -        | -        | -        | 2        | -        | 4                     | 17        | -        | 100                          | 100       | -        | -        |                |
| MQP70372       | Deadman Quartzite     | North Peak      | 79                                        | 4        | -        | -        | -        | -        | 2        | -        | 5                     | 11        | -        | 100                          | 100       | -        | 0        |                |
| MQP70373       | Deadman Quartzite     | North Peak      | 83                                        | -        | -        | -        | -        | -        | 2        | -        | 5                     | 10        | -        | 100                          | 99        | 0        | 0        |                |
| MQP70374       | • Deadman Quartzite   | North Peak      | 69                                        | -        | -        | -        | -        | -        | 4        | -        | 12                    | 12        | 3        | 100                          | 100       | -        | 0        | 80 3 17        |
| MQP62730       | Deadman Quartzite     | Pine Creek      | 70                                        | 2        | 1        | -        | -        | -        | -        | 1        | 19                    | 6         | 3        | 100                          | 99        | 1        | -        |                |
| MQP62731       | Deadman Quartzite     | Pine Creek      | 73                                        | 4        | -        | 1        | -        | -        | 7        | 1        | 3                     | 10        | 1        | 100                          | 99        | 0        | 1        |                |
| MQP62732       | Deadman Quartzite     | Pine Creek      | 76                                        | -        | -        | -        | -        | -        | 9        | -        | 8                     | 4         | 4        | 100                          | 100       | -        | -        |                |
| MQP62733       | Deadman Quartzite     | Pine Creek      | 68                                        | -        | -        | -        | -        | -        | 7        | 1        | 9                     | 10        | 6        | 100                          | 100       | -        | -        |                |
| MQP62733A      | • Deadman Quartzite   | Pine Creek      | 59                                        | -        | 1        | -        | 9        | -        | 12       | 1        | 10                    | 7         | 2        | 100                          | 88        | 1        | 11       | 74 2 24        |
| MQP62734       | Deadman Quartzite     | Pine Creek      | 71                                        | 4        | -        | -        | 1        | -        | 5        | -        | 13                    | 4         | 4        | 100                          | 99        | -        | 1        |                |
| MQP62737       | Deadman Quartzite     | Pine Creek      | 74                                        | -        | -        | -        | -        | -        | 2        | -        | 11                    | 15        | -        | 100                          | 100       | -        | -        |                |
| MQP62739       | Deadman Quartzite     | Pine Creek      | 84                                        | -        | -        | -        | -        | -        | 2        | -        | 6                     | 8         | -        | 100                          | 100       | 0        | -        |                |
| TB6A           | t Deadman Quartzite   | Pine Creek      | 52                                        | 4        | -        | -        | -        | 1        | 1        | 1        | 30                    | 12        | -        | 100                          | 98        | -        | 2        |                |
| TB10A+         | t Deadman Quartzite   | Pine Creek      | 51                                        | 6        | -        | -        | 1        | 1        | -        | 1        | 33                    | 8         | -        | 100                          | 98        | -        | 2        |                |
| TB12H          | t Deadman Quartzite   | Pine Creek      | 63                                        | 3        | -        | -        | -        | 2        | 1        | 1        | 18                    | 12        | -        | 100                          | 97        | -        | 3        |                |
| <b>AVERAGE</b> |                       |                 | <b>72</b>                                 | <b>3</b> | <b>1</b> | <b>1</b> | <b>3</b> | <b>1</b> | <b>3</b> | <b>1</b> | <b>12</b>             | <b>10</b> | <b>2</b> | <b>100</b>                   | <b>99</b> | <b>0</b> | <b>2</b> | <b>78 2 21</b> |
| MM5A           | t Maverick Shale      | Maverick Basin  | 62                                        | 1        | -        | -        | 1        | 4        | 1        | -        | 9                     | 22        | -        | 100                          | 93        | -        | 7        |                |
| MM7A+          | t Maverick Shale      | Maverick Basin  | 65                                        | 7        | 3        | 3        | 1        | -        | 3        | 1        | 1                     | 17        | -        | 100                          | 93        | 3        | 4        |                |
| MM9E           | t Maverick Shale      | Maverick Basin  | 75                                        | 2        | -        | -        | -        | -        | 2        | -        | 2                     | 18        | -        | 100                          | 100       | -        | -        |                |
| TB15B+         | t Maverick Shale      | Pine Creek      | 61                                        | 5        | -        | -        | -        | -        | 2        | 4        | 19                    | 9         | -        | 100                          | 100       | -        | -        |                |
| M.TB.172       | • Mazatzal Peak Quart | Barnhardt Canyc | 58                                        | 12       | -        | -        | -        | -        | 2        | -        | 14                    | 14        | -        | 100                          | 100       | -        | 0        | 84 3 13        |
| M.TB.175       | • Mazatzal Peak Quart | Barnhardt Canyc | 56                                        | 14       | -        | -        | -        | -        | 4        | 1        | 12                    | 13        | 1        | 100                          | 100       | -        | -        | 84 1 15        |
| M.BC.450       | • Mazatzal Peak Quart | Barnhardt Canyc | 60                                        | 3        | -        | 3        | -        | -        | 6        | -        | 23                    | 5         | -        | 100                          | 95        | 0        | 5        | 73 6 21        |
| M.BC.452       | Mazatzal Peak Quart   | Barnhardt Canyc | 60                                        | 3        | -        | 3        | 1        | -        | 2        | -        | 26                    | 4         | -        | 100                          | 94        | 0        | 6        |                |
| MQP62511       | Mazatzal Peak Quart   | Barnhardt Canyc | 64                                        | -        | -        | -        | -        | -        | 6        | -        | 25                    | 5         | 1        | 100                          | 100       | -        | 0        |                |
| MQP62512       | • Mazatzal Peak Quart | Barnhardt Canyc | 64                                        | 1        | 2        | 2        | 1        | -        | 4        | 1        | 21                    | 2         | 3        | 100                          | 95        | 2        | 3        | 69 10 22       |
| MQP62513       | Mazatzal Peak Quart   | Barnhardt Canyc | 64                                        | -        | -        | -        | 1        | -        | 7        | -        | 23                    | 4         | 2        | 100                          | 99        | 0        | 1        |                |
| MQP62514       | Mazatzal Peak Quart   | Barnhardt Canyc | 72                                        | -        | -        | -        | 3        | -        | 6        | -        | 12                    | 6         | 2        | 100                          | 96        | -        | 4        |                |
| MQP62515       | Mazatzal Peak Quart   | Barnhardt Canyc | 66                                        | -        | -        | -        | 1        | -        | 8        | -        | 16                    | 8         | 1        | 100                          | 98        | -        | 2        |                |
| MQP6304B       | • Mazatzal Peak Quart | Barnhardt Canyc | 80                                        | 1        | 1        | -        | -        | -        | -        | 1        | 3                     | 10        | 5        | 100                          | 99        | 1        | -        | 86 7 7         |
| MQP63047       | • Mazatzal Peak Quart | Barnhardt Canyc | 81                                        | -        | -        | -        | 1        | -        | 1        | -        | 7                     | 10        | 2        | 100                          | 99        | -        | 1        | 89 2 9         |
| MQP63053       | • Mazatzal Peak Quart | Barnhardt Canyc | 73                                        | -        | -        | -        | 1        | -        | -        | -        | 13                    | 14        | -        | 100                          | 99        | -        | 1        | 84 6 10        |
| MQP70485       | Mazatzal Peak Quart   | Barnhardt Canyc | 75                                        | -        | -        | -        | -        | -        | 11       | -        | 7                     | 3         | 4        | 100                          | 100       | -        | 0        |                |
| BC1C           | t Mazatzal Peak Quart | Barnhardt Canyc | 67                                        | 3        | 1        | 1        | -        | -        | 2        | 1        | 4                     | 22        | -        | 100                          | 98        | 1        | 1        |                |
| BC2A           | t Mazatzal Peak Quart | Barnhardt Canyc | 76                                        | 4        | -        | 1        | 2        | 2        | -        | -        | 4                     | 12        | -        | 100                          | 95        | -        | 5        |                |
| BC5A           | t Mazatzal Peak Quart | Barnhardt Canyc | 45                                        | 3        | 1        | -        | -        | 3        | 3        | -        | 23                    | 23        | -        | 100                          | 93        | 2        | 5        |                |
| BC7N           | t Mazatzal Peak Quart | Barnhardt Canyc | 74                                        | 2        | -        | -        | -        | 3        | -        | -        | 15                    | 6         | -        | 100                          | 96        | -        | 4        |                |
| BC9C           | t Mazatzal Peak Quart | Barnhardt Canyc | 87                                        | 5        | -        | -        | -        | -        | 1        | -        | 2                     | 6         | -        | 100                          | 100       | -        | -        |                |
| BC10C          | t Mazatzal Peak Quart | Barnhardt Canyc | 62                                        | 1        | -        | -        | -        | 1        | 2        | 1        | 14                    | 19        | -        | 100                          | 98        | -        | 2        |                |
| BC12AA         | t Mazatzal Peak Quart | Barnhardt Canyc | 81                                        | 4        | -        | -        | -        | 1        | 2        | -        | 1                     | 12        | -        | 100                          | 99        | -        | 1        |                |
| BC12I          | t Mazatzal Peak Quart | Barnhardt Canyc | 83                                        | 4        | -        | -        | -        | 1        | 1        | -        | 4                     | 8         | -        | 100                          | 99        | -        | 1        |                |
| MQP707111      | Mazatzal Peak Quar    | Shaketree Cany  | 61                                        | -        | -        | -        | 2        | -        | 12       | 1        | 14                    | 7         | 3        | 100                          | 97        | 0        | 3        |                |



Table DR2. XRF analyses for Mazatzal Group quartzites. Samples were analysed commercially by Activation Laboratories\*. Data are in

| Sample Number Formation |                         | Locality         | Major oxide concentrations |                                |                                |            |            |                   |                  |                  |            |                               |
|-------------------------|-------------------------|------------------|----------------------------|--------------------------------|--------------------------------|------------|------------|-------------------|------------------|------------------|------------|-------------------------------|
|                         |                         |                  | SiO <sub>2</sub>           | Al <sub>2</sub> O <sub>3</sub> | Fe <sub>2</sub> O <sub>3</sub> | MgO        | CaO        | Na <sub>2</sub> O | K <sub>2</sub> O | TiO <sub>2</sub> | MnO        | P <sub>2</sub> O <sub>5</sub> |
| DM.STC.444              | Deadman Quartzite       | Shaketree Canyon | 92.8                       | 4.6                            | 1.0                            | 0.00       | 0.00       | 0.00              | 0.00             | 0.10             | 0.01       | 0                             |
| MQP62623                | Deadman Quartzite       | Shaketree Canyon | 94.8                       | 2.1                            | 1.5                            | 0.18       | 0.02       | 0.14              | 0.09             | 0.13             | 0.00       | 0                             |
| MQP70374                | Deadman Quartzite       | North Peak       | 90.9                       | 1.9                            | 6.0                            | 0.11       | 0.07       | 0.13              | 0.18             | 0.09             | 0.07       | 0                             |
| MQP62733A               | Deadman Quartzite       | Pine Creek       | 88.3                       | 3.7                            | 4.4                            | 1.27       | 0.03       | 0.15              | 0.05             | 0.38             | 0.02       | 0                             |
| M.TB.172                | Deadman Quartzite       | Pine Creek       | 93.1                       | 3.6                            | 2.1                            | 0.00       | 0.00       | 0.00              | 0.40             | 0.10             | 0.02       | 0                             |
| M.TB.175                | Deadman Quartzite       | Pine Creek       | 94.9                       | 1.9                            | 2.0                            | 0.00       | 0.00       | 0.00              | 0.10             | 0.10             | 0.01       | 0                             |
| M.BC.450                | Mazatzal Peak Quartzite | Barnhardt Canyon | 92.7                       | 3.8                            | 0.8                            | 0.20       | 0.00       | 0.00              | 1.00             | 0.20             | 0.01       | 0                             |
| MQP62512                | Mazatzal Peak Quartzite | Barnhardt Canyon | 89.9                       | 4.7                            | 2.2                            | 0.26       | 0.05       | 0.19              | 1.30             | 0.12             | 0.00       | 0                             |
| MQP6304B                | Mazatzal Peak Quartzite | Barnhardt Canyon | 92.6                       | 3.1                            | 1.4                            | 0.15       | 0.02       | 0.17              | 0.82             | 0.18             | 0.00       | 0                             |
| MQP63047                | Mazatzal Peak Quartzite | Barnhardt Canyon | 98.1                       | 0.7                            | 0.8                            | 0.05       | 0.05       | 0.15              | 0.08             | 0.03             | 0.00       | 0                             |
| MQP63053                | Mazatzal Peak Quartzite | Barnhardt Canyon | 95.7                       | 2.0                            | 0.7                            | 0.11       | 0.03       | 0.15              | 0.59             | 0.08             | 0.00       | 0                             |
| MQP707113               | Mazatzal Peak Quartzite | Shaketree Canyon | 92.3                       | 3.6                            | 1.1                            | 0.33       | 0.09       | 0.15              | 0.85             | 0.17             | 0.01       | 0                             |
| MQP702FL                | Mazatzal Peak Quartzite | North Peak       | 93.4                       | 2.5                            | 1.2                            | 0.11       | 0.03       | 0.13              | 0.21             | 0.24             | 0.00       | 0                             |
| <b>MEDIAN</b>           |                         |                  | <b>92.8</b>                | <b>3.1</b>                     | <b>1.4</b>                     | <b>0.1</b> | <b>0.0</b> | <b>0.1</b>        | <b>0.2</b>       | <b>0.1</b>       | <b>0.0</b> | <b>0</b>                      |

\* Ancaster, Ontario, Canada
